# Supplementary material for: Analysis of the significance and gender differences in the factors influencing antisocial behaviors among adolescents
Source: Research Square preprint supplement (doi:10.21203/rs.3.rs-5047713/v1), 2025-04-03
Supplement: Supplementary file 1 [file 8ab95b68249818a110affeca.xlsx]

## Sheet: Sheet1
Supplementary Table 1 Logistic regression analysis results for each influential factor (Male)							Supplementary Table 2 Results of Logistic Regression Analysis of Influential Factors (Female)
Item	Regression coefficient	Standard error	Wald	P	OR		Item	Regression coefficient	Standard error	Wald	P	OR
How much your friends care about you	-0.033	0.026	1.713	0.191	0.967		Parents' educational expectations of you	-0.102	0.027	14.419	0.000**	0.903
Smoking behavior	0.054	0.025	4.85	0.028**	1.055		Daily Screen Time	0.001	0.019	0.004	0.948	1.001
Parents' educational expectations of you	-0.06	0.024	6.088	0.014**	0.942		How much your friends care about you	-0.018	0.027	0.434	0.51	0.982
Number of good friends	0.115	0.025	20.529	0.000**	1.122		Smoking behavior	0.064	0.03	4.453	0.035**	1.066
Daily Screen Time	-0.025	0.016	2.373	0.123	0.975		Family economic condition	0.088	0.042	4.386	0.036**	1.092
Current place of residence	0.038	0.016	5.655	0.017**	1.039		Current place of residence	-0.005	0.015	0.104	0.747	0.995
Family economic condition	0.026	0.04	0.409	0.523	1.026		Engage in regular physical activity	0.051	0.03	2.996	0.083	1.053
Engage in regular physical activity	-0.088	0.033	7.178	0.007**	0.916		Satisfaction with sleep quality	0.015	0.034	0.209	0.647	1.016
